# Supplementary material
Source: PubMed Central journal article supplement (PMC5505214)
Supplement: en.2016-1939.sf1.pdf [file en.2016-1939.sf1.pdf]

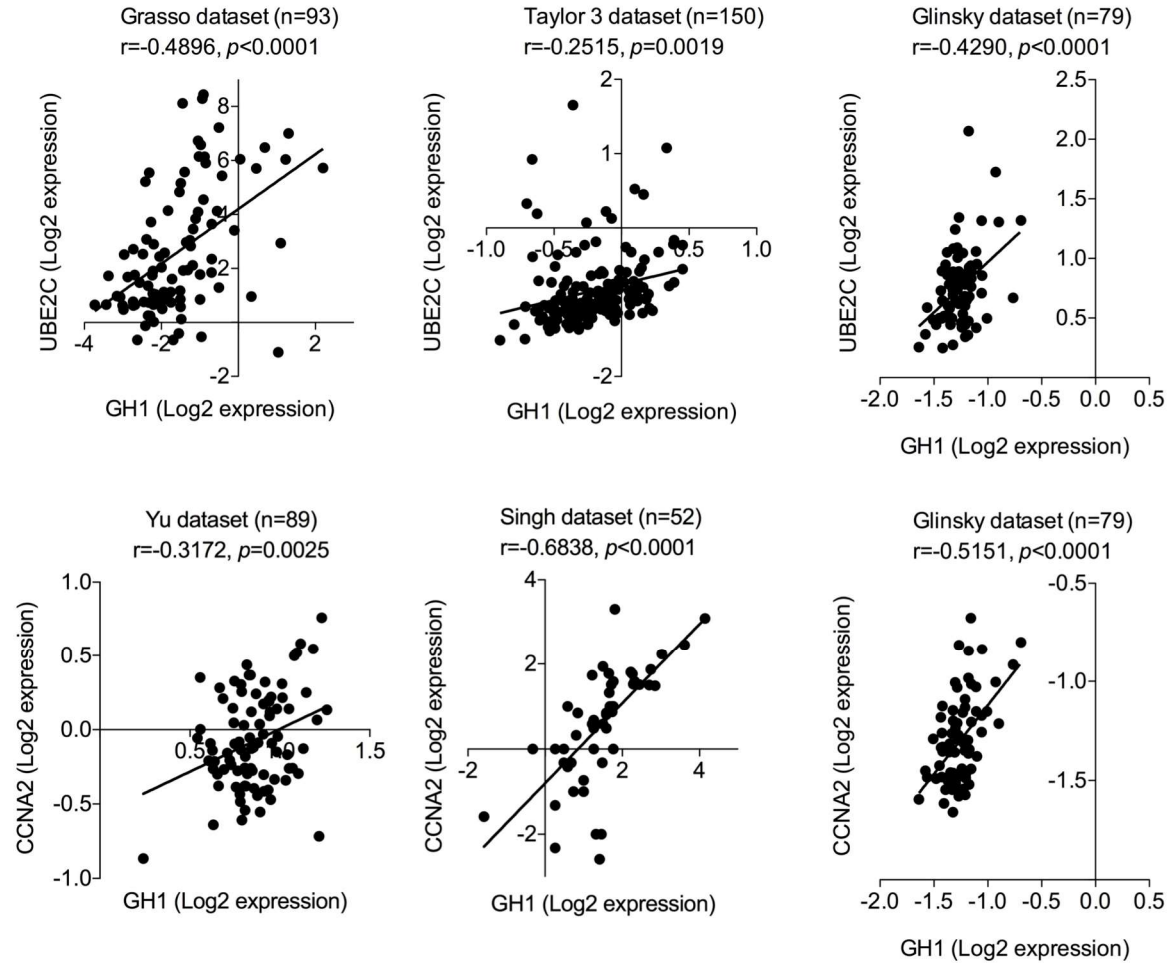

**Supplemental Fig 1. Correlation between GH expression and ARv7 target genes in human PCa datasets.**

Correlation between GH and ARv7 target genes: UBE2C (upper panel) and CCNA2 (lower panel) gene expression in human prostate cancer datasets downloaded from Oncomine. Three different datasets were analyzed by Pearson's correlation test. A larger set of AR and AR-v7 regulated genes correlating with GH can be found in supplementary tables 1 and 2.

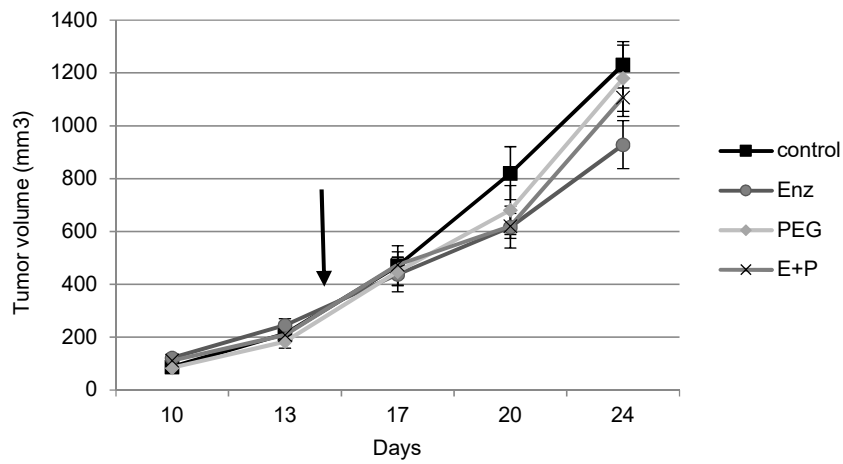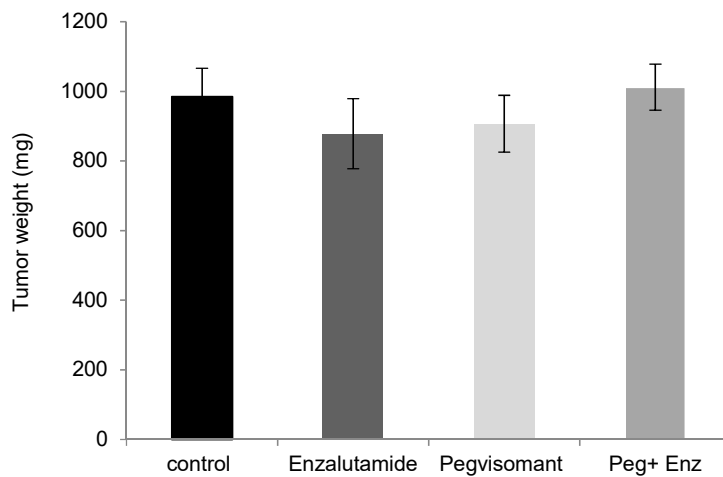

**Supplemental Fig 2. 22Rv1 xenograft tumor growth.**

a) Tumor volume was measured with a caliper twice a week starting from day 10 after 22Rv1 cell injection and up to day 24 when the experiment finished. The arrow indicates starting point of treatments. b) Tumor weight was measured after resection in a precision scale.

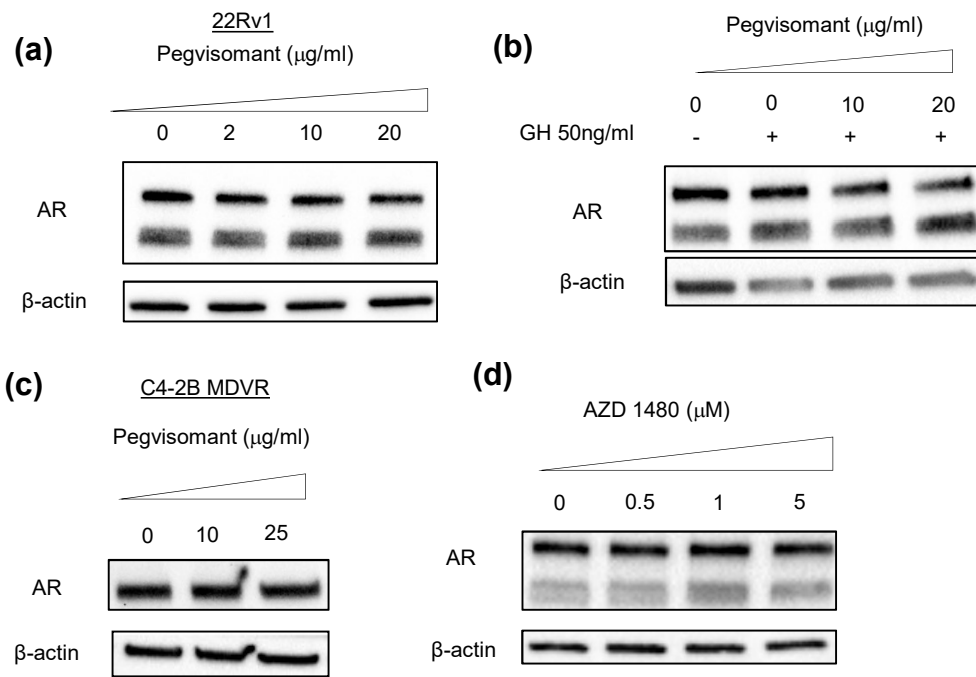

### Supplemental figure 3. Full length AR is not modulated by hGH

Western blot analysis of AR expression levels in 22Rv1 cells treated with the indicated concentrations of Pegvisomant alone (A) or in combination with 50ng/ml GH treatment for 24h (B). C) C4-2B MDVR cells treated with indicated concentrations of pegvisomant for 24h and D) 22Rv1 cells treated with Jack2/Stat5 inhibitor AZD 1480 for 24h. Experiments in panels A-D were repeated 3 times. No significant differences were found on AR intensity levels.

| Gene   | Grasso (n=93) |         | Taylor 3 (n=150) |         | Glinsky (n=79) |         | Yu (n=89) |        |
|--------|---------------|---------|------------------|---------|----------------|---------|-----------|--------|
|        | r             | p       | r                | p       | r              | p       | r         | p      |
| ABHD2  | 0.0890        | 0.3960  | -0.3898          | <0.0001 | 0.0653         | 0.5675  | 0.0305    | 0.7764 |
| ACSL3  | -0.3726       | 0.0002  | -0.5295          | <0.0001 | -0.5534        | <0.0001 | -0.1905   | 0.0738 |
| BRP44  | -0.4865       | <0.0001 | -0.3851          | <0.0001 | -0.3402        | 0.0022  | -0.1874   | 0.0787 |
| DBI    | -0.3680       | 0.0003  | -0.4178          | <0.0001 | -0.1310        | 0.2500  | -0.2641   | 0.0124 |
| FKBP5  | 0.4534        | <0.0001 | -0.5298          | <0.0001 | -0.2780        | 0.0131  | -0.2306   | 0.0297 |
| KLK2   | -0.3571       | 0.0004  | -0.2283          | 0.0050  | -0.3337        | 0.0027  | -0.1893   | 0.0756 |
| KLK3   | -0.5280       | <0.0001 | -0.2228          | 0.0061  | -0.3251        | 0.0035  | -0.2467   | 0.0198 |
| KRT8   | 0.3263        | 0.0014  | -0.4961          | <0.0001 | -0.2170        | 0.0548  | -0.2224   | 0.0362 |
| MAOA   | -0.2284       | 0.0276  | -0.2346          | 0.0039  | -0.2386        | 0.0342  | -0.0833   | 0.4379 |
| NDRG1  | -0.0384       | 0.7146  | -0.5314          | <0.0001 | -0.4276        | <0.0001 | -0.2564   | 0.0153 |
| NKX3-1 | -0.3871       | 0.0001  | -0.3918          | <0.0001 | -0.0214        | 0.8515  | 0.0973    | 0.3646 |
| SORD   | -0.2967       | 0.0039  | -0.3204          | <0.0001 | -0.1492        | 0.1893  | -0.1976   | 0.0635 |

**Supplemental Table 1. A summary of co-expression correlations between GH1 and a AR target gene set from 4 independent clinical PCa data sets deposited at Oncomine.**

Pearson's r and p value of each correlation are shown. Each correlation shadowed in green indicates a significant negative co-expression correlation between GH1 and individual AR target gene as indicated in each data set. The AR target gene set was constructed based on a published study (Miyamoto et al, Cancer Discov, 2012, 2:995-1003).  $p < 0.05$  was considered statistically significant.

| Gene   | Grasso (n=93) |         | Taylor 3 (n=150) |         | Glinsky (n=79) |         | Yu (n=89) |         | Singh (n=52) |         |
|--------|---------------|---------|------------------|---------|----------------|---------|-----------|---------|--------------|---------|
|        | r             | p       | r                | p       | r              | p       | r         | p       | r            | p       |
| AKT1   | 0.0400        | 0.7036  | -0.5563          | <0.0001 | -0.0757        | 0.5074  | -0.2686   | 0.0109  | -0.5786      | <0.0001 |
| BIRC5  | 0.4615        | <0.0001 | 0.7630           | <0.0001 | 0.5933         | <0.0001 | 0.2281    | 0.0316  | 0.3729       | 0.0065  |
| BUB1   | 0.3038        | 0.0034  | 0.1797           | 0.0278  | 0.2868         | 0.0104  | -0.1835   | 0.0852  | 0.3537       | 0.0101  |
| BUB1B  | 0.1650        | 0.1159  | 0.2416           | 0.0029  | 0.0980         | 0.3901  | -0.0081   | 0.9400  | 0.4658       | 0.0005  |
| CCNA2  | 0.1496        | 0.1717  | 0.0639           | 0.4369  | 0.5151         | <0.0001 | 0.3172    | 0.0025  | 0.6838       | <0.0001 |
| CDC20  | 0.3237        | 0.0016  | 0.6443           | <0.0001 | 0.2329         | 0.0388  | 0.3598    | 0.0005  | -0.2469      | 0.0776  |
| CDC25C | 0.2312        | 0.0355  | 0.7008           | <0.0001 | 0.2952         | 0.0083  | 0.2720    | 0.0099  | 0.7237       | <0.0001 |
| CDCA5  | 0.4688        | <0.0001 | 0.5943           | <0.0001 | NA             | NA      | NA        | NA      | NA           | NA      |
| CENPE  | -0.0398       | 0.7131  | -0.1285          | 0.1170  | 0.4637         | <0.0001 | 0.1182    | 0.2701  | -0.0398      | 0.7792  |
| CIT    | 0.5588        | <0.0001 | 0.3102           | 0.0001  | 0.3732         | 0.0007  | 0.1552    | 0.1464  | -0.4556      | 0.0007  |
| ESPL1  | 0.3625        | 0.0004  | 0.8442           | <0.0001 | 0.4842         | <0.0001 | 0.3504    | 0.0008  | 0.6271       | <0.0001 |
| KIF15  | 0.1023        | 0.3290  | 0.2326           | 0.0042  | 0.4505         | <0.0001 | NA        | NA      | NA           | NA      |
| KIF2C  | 0.4533        | <0.0001 | 0.4170           | <0.0001 | 0.2715         | 0.0155  | 0.1743    | 0.1022  | 0.3864       | 0.0047  |
| KNTC1  | 0.3528        | 0.0006  | -0.3179          | <0.0001 | 0.1061         | 0.3519  | 0.0007    | 0.9947  | -0.0200      | 0.8883  |
| KPNA2  | 0.2057        | 0.0479  | -0.3543          | <0.0001 | -0.1924        | 0.0894  | -0.2557   | 0.0156  | -0.5381      | <0.0001 |
| MAD2L2 | 0.2270        | 0.0287  | -0.2912          | 0.0003  | NA             | NA      | NA        | NA      | NA           | NA      |
| MYC    | 0.4725        | <0.0001 | -0.4758          | <0.0001 | -0.0260        | 0.8202  | 0.5676    | <0.0001 | 0.7993       | <0.0001 |
| NEK2   | 0.1772        | 0.0892  | 0.1658           | 0.0426  | 0.0067         | 0.9534  | 0.2238    | 0.0350  | 0.1430       | 0.3118  |
| NUSAP1 | 0.2683        | 0.0097  | -0.0844          | 0.3043  | 0.1429         | 0.2089  | NA        | NA      | NA           | NA      |
| PKMYT1 | 0.4946        | <0.0001 | 0.8139           | <0.0001 | 0.5215         | <0.0001 | 0.1444    | 0.1771  | -0.2274      | 0.1050  |
| PLK1   | 0.4967        | <0.0001 | 0.4031           | <0.0001 | 0.4695         | <0.0001 | 0.2494    | 0.0184  | 0.5430       | <0.0001 |
| TPX2   | 0.2633        | 0.0108  | 0.1069           | 0.1928  | 0.4733         | <0.0001 | 0.2001    | 0.0601  | 0.5615       | <0.0001 |
| UBE2C  | 0.4896        | <0.0001 | 0.2516           | 0.0019  | 0.4290         | <0.0001 | 0.2370    | 0.0254  | -0.5577      | <0.0001 |
| UGT2B1 | 0.3090        | 0.0026  | 0.2855           | 0.0004  | 0.2835         | 0.0114  | 0.1226    | 0.2230  | 0.4586       | 0.0006  |
| ZWINT  | NA            | NA      | 0.3766           | <0.0001 | 0.0738         | 0.5182  | -0.1295   | 0.2265  | 0.2875       | 0.0388  |

**Supplemental Table 2. A summary of co-expression correlations between GH1 and a AR-V7 target gene set from 5 independent clinical PCa data sets deposited at Oncomine.**

Pearson's r and p value of each correlation are shown. Each correlation shadowed in green indicates a significant positive co-expression correlation between GH1 and individual AR-V7 target gene as indicated in each data set. The AR-V7 target gene set was constructed based on two published studies (Hu et al, Cancer Res, 2012, 72:3457-62; Zhang et al, PLoS One, 2011, 6:e27970).  $p < 0.05$  was considered statistically significant.
